# Supplementary material for: Estimating Biomass and Carbon Sequestration Capacity of Phragmites australis Using Remote Sensing and Growth Dynamics Modeling: A Case Study in Beijing Hanshiqiao Wetland Nature Reserve, China
Source: MDPI journal article supplement (doi:10.3390/s22093141), 2022-04-20
Supplement: s1 [file s1]

## 1. Figure

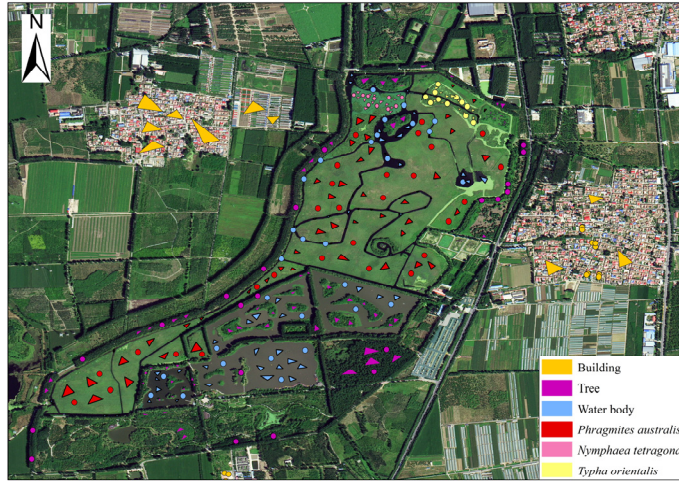

**Figure S1.** Ground-truth samples of ground objects, including building, tree, water body, *Phragmites australis*, *Nymphaea tetragona*, and *Typha orientalis*, where triangles and circles represent training samples and validation samples, respectively.

## 2. Table

**Table S1.** Parameters used in the growth dynamics model.

| Parameter                                                                   | Notation            |
|-----------------------------------------------------------------------------|---------------------|
| Maximum specific growth rate of roots at 20 °C                              | $g_m$               |
| Specific dark respiration rate of shoots at 20 °C                           | $\beta_{msht}$      |
| Specific respiration rate of roots at 20 °C                                 | $\beta_{rt}$        |
| Specific respiration rate of old rhizomes at 20 °C                          | $\beta_{rhi}$       |
| Specific respiration rate of new rhizomes at 20 °C                          | $R_n$               |
| Specific respiration rate of panicles at 20 °C                              | $R_p$               |
| Specific mortality rate of shoots from $t_b$ to $t_p$ at 20 °C              | $\gamma'_{sht}$     |
| Specific mortality rate of shoots from $t_p$ to $t_s$ at 20 °C              | $\gamma_{sht}$      |
| Specific mortality rate of shoots after $t_s$ at 20 °C                      | $\gamma'_{sht}$     |
| Specific mortality rate of panicles from $t_p$ to $t_s$ at 20 °C            | $\gamma_p$          |
| Specific mortality rate of panicles after $t_s$ at 20 °C                    | $\gamma_p$          |
| Specific mortality rate of roots at 20 °C                                   | $\gamma'_{rt}$      |
| Specific mortality rate of old rhizomes at 20 °C                            | $\gamma'_{rhi}$     |
| Specific mortality rate of new rhizomes at 20 °C                            | $\gamma'_n$         |
| Fraction of current photosynthesis translocation to below ground structures | $\varepsilon_{ph}$  |
| Fraction of shoot assimilates translocation to below ground structures      | $\varepsilon_{sht}$ |
| Fraction of shoot assimilates translocated for old rhizomes                 | $y$                 |
| Fraction of shoot assimilates translocation for inflorescence               | $p$                 |
| Fraction of current photosynthesis translocation to inflorescence           | $k$                 |
| Fraction of shoot biomass for elongation                                    | $q$                 |
| Fraction mobilized from rhizomes for root formation                         | $x$                 |
| Maximum specific net daily photosynthesis rate of at 20 °C                  | $P_m$               |
| Half saturation constant of age for shoot photosynthesis                    | $K_{age}$           |
| Half saturation constant of <i>PAR</i> for shoot photosynthesis             | $K_{PAR}$           |
| Half saturation constant of age for root growth                             | $K_{rt}$            |
| Temperature constant                                                        | $\theta$            |
| Conversion constant of carbon dioxide to ash-free dry weight                | $k_m$               |
| The date when roots and flowering shoots start growing                      | $t_r$               |
| The date when non-flowering shoots start growing                            | $t_b$               |
| The date when peduncles and new rhizomes start forming                      | $t_p$               |
| The date when panicles start forming                                        | $t_f$               |
| The date when the upward translocation from old rhizomes terminates         | $t_e$               |
| The date that marks the onset of senescence                                 | $t_s$               |

**Table S2.** Total annual biomass of mortality of *P. australis* growing with different nutrient availability.

| Changes in nutrient level                 | -50%    | -25%     | ±0%      | +25%     | +50%     |
|-------------------------------------------|---------|----------|----------|----------|----------|
| Biomass of mortality (g m <sup>-2</sup> ) | 3419.48 | 3933.002 | 4272.437 | 4532.113 | 4724.532 |

### 3. Equation

In this section we document the equations used to simulate the growth dynamics of *P. australis*. Phenological points used in these equations, including  $t_r, t_b, t_p, t_f, t_e$  and  $t_s$ , are illustrated in Section 2.3.1 of the main text.

Equations S1–S5 show the net growth of each organ of *P. australis*, where the subscript rhi, rt, n, sht, and p represent old rhizomes, roots, new rhizomes, shoots, and panicles, respectively.

$$\frac{\partial B_{\text{rhi}}}{\partial t} = -R_{\text{rhi}} - D_{\text{rhi}} - \text{Rhif} \times f_{\text{rhi}} + y \sum_{i=1}^{i=\text{imax}} \varepsilon_{\text{sht}} b_{\text{sht}}(i) f_{\text{sht}} + y \sum_{i=1}^{i=\text{imax}} \varepsilon_{\text{ph}} \text{Ph}_{\text{sht}}(i) f_{\text{ph}} \quad (\text{S1})$$

$$\frac{\partial B_{\text{rt}}}{\partial t} = G_{\text{rt}} f_{\text{rt}} - R_{\text{rt}} - D_{\text{rt}} + x \text{Rhif} \times f_{\text{rhi}} \quad (\text{S2})$$

$$\frac{\partial B_{\text{n}}}{\partial t} = -R_{\text{n}} - D_{\text{n}} + (1-y) \sum_{i=1}^{i=\text{imax}} \varepsilon_{\text{sht}} b_{\text{sht}}(i) f_{\text{sht}} + (1-y) \sum_{i=1}^{i=\text{imax}} \varepsilon_{\text{ph}} b_{\text{ph}}(i) f_{\text{ph}} \quad (\text{S3})$$

$$\begin{aligned} \frac{\partial b_{\text{sht}}(i)}{\partial t} = & \text{Ph}_{\text{sht}}(i) - R_{\text{sht}}(i) - D_{\text{sht}}(i) + (1-x) \text{Rhif} \times f_{\text{rhi}} \left( \frac{b_{\text{sht}}(i)}{B_{\text{sht}}} \right) - \varepsilon_{\text{sht}} b_{\text{sht}}(i) f_{\text{sht}} \\ & - \varepsilon_{\text{ph}} \text{Ph}_{\text{sht}}(i) f_{\text{ph}} - (b_{\text{sht}}(i) \varepsilon_{\text{p}} + \text{Ph}_{\text{sht}}(i) k) ff - G_{\text{rt}} f_{\text{rt}} \left( \frac{b_{\text{sht}}(i)}{B_{\text{sht}}} \right) \end{aligned} \quad (\text{S4})$$

$$\frac{\partial B_{\text{p}}}{\partial t} = -R_{\text{p}}(i) - D_{\text{p}}(i) + \sum_{i=1}^{i=\text{imax}} \text{Ph}_{\text{sht}}(i) k \times ff + \sum_{i=1}^{i=\text{imax}} \varepsilon_{\text{p}} b_{\text{sht}}(i) ff \quad (\text{S5})$$

For Equation S1,  $R_{\text{rhi}}$  and  $D_{\text{rhi}}$  are the specific rates of respiration and mortality, respectively, at 20 °C for old rhizomes;  $\text{Rhif}$  is the mobilization of stored material from rhizomes to roots and shoots during the initial stage of growth;  $f_{\text{rhi}}$  assumes unity for  $t_b \leq t \leq t_e$  and 0 otherwise;  $b_{\text{sht}}(i)$  is the shoot biomass of layer  $i$ ;  $\varepsilon_{\text{sht}}$  is the fraction of shoot assimilating translocation to below-ground structures;  $f_{\text{sht}}$  assumes unity for  $t > t_s$  and 0 otherwise;  $\varepsilon_{\text{ph}}$  is the fraction of current photosynthesis translocation to below-ground structures;  $\text{Ph}_{\text{sht}}(i)$  represents the shoot biomass of layer  $i$  accumulated by photosynthesis, which can be calculated using Equation S11;  $f_{\text{ph}}$  assumes unity for  $t_p \leq t \leq t_s$  and 0 otherwise.

For Equation S2,  $G_{\text{rt}}$  is the supply of photosynthesized material for root growth, which can be calculated using Equation S10;  $f_{\text{rt}}$  assumes 1 for  $t_r \leq t \leq t_p$  and 0 otherwise;  $R_{\text{rt}}$  and  $D_{\text{rt}}$  represent the specific rates of respiration and mortality, respectively, at 20 °C for roots;  $x$  is the fraction mobilized from

rhizomes for root formation.

For Equation S3,  $R_n$  and  $D_n$  represent the specific rates of respiration and mortality, respectively, at 20 °C for new rhizomes;  $y$  is the fraction shoot assimilates translocated for old rhizomes.

For Equation S4,  $R_{\text{sht}}(i)$  and  $D_{\text{sht}}(i)$  represent the specific rates of respiration and mortality, respectively, at 20 °C for shoots in layer  $i$ ;  $f_{\text{sht}}$  assumes 1 for  $t > t_s$  and 0 otherwise;  $k$  and  $\varepsilon_p$  are the fractions of contribution of the current photosynthesis and accumulated shoot dry matter to the formation of panicles;  $ff$  assumes 1 for  $t_f \leq t$  and 0 otherwise.

For Equation S5,  $R_p(i)$  and  $D_p(i)$  represent the specific rates of respiration and mortality, respectively, at 20 °C for panicles in layer  $i$ .

$R_{\text{hif}}$ ,  $R_a$ ,  $D_a$ ,  $G_{\text{rt}}$ ,  $\text{Ph}_{\text{sht}}(i)$  in Equations S6–S15 were calculated as follows:

$$R_{\text{hif}} = \alpha_{\text{rhi}} \theta^{(T-20)} B_{\text{rhi}} \quad (\text{S6})$$

$$\alpha_{\text{rhi}} = 0.58(\text{initial rhizome biomass})^{-0.50} \quad (\text{S7})$$

where  $\alpha_{\text{rhi}}$  is the specific transfer rate of rhizome biomass;  $\theta$  (=1.09) is the temperature constant;  $T$  stands for the average daily temperature.

$$R_a = \beta_a \theta^{(T-20)} B_a \quad (\text{S8})$$

$$D_a = \gamma_a \theta^{(T-20)} B_a \quad (\text{S9})$$

where  $\gamma_a$  and  $\beta_a$  are the specific rates of respiration and mortality, respectively, at 20 °C; subscript  $a$  represents old rhizomes, new rhizomes, roots, panicles, or shoots.

$$G_{\text{rt}} = g_m \theta^{(T-20)} \frac{K_{\text{rt}}}{K_{\text{rt}} + \text{Age}_{\text{rt}}} B_{\text{rt}} \quad (\text{S10})$$

where  $g_m$  is the maximum specific growth rate of roots at 20 °C;  $K_{\text{rt}}$  is the half saturation coefficient of root age;  $\text{Age}_{\text{rt}}$  is the age of roots in days from the start of root growth;  $B_{\text{rt}}$  represents the biomass of roots.

$$\text{Ph}_{\text{sht}}(i) = P_m k_{\text{co}} \theta^{(T-20)} \frac{I_{\text{PAR}}(i)}{K_{\text{PAR}} + I_{\text{PAR}}(i)} \times \frac{K_{\text{age}}}{K_{\text{age}} + \text{Age}_{\text{sht}}} b_{\text{sht}}(i) \quad (\text{S11})$$

where  $P_m$  is the maximum specific net daily photosynthesis rate of the plant top at 20 °C in the absence of light and nutrient limitations;  $k_{\text{co}}$  is the

conversion constant of carbon dioxide to ash-free dry weight;  $\text{Age}_{\text{sh}}^{\text{sh}}$  is the age of shoots from the start of growth;  $K_{\text{PAR}}$  and  $K_{\text{age}}$  are the half saturation coefficients of photosynthetically active radiation (PAR) and age, respectively.  $I_{\text{PAR}}(i)$  is the photosynthetically active radiation in the  $i$ th layer of shoot, which reads

$$I_{\text{PAR}} = 0.45 \times \text{global radiation} \quad (\text{S12})$$

$$I_{\text{PAR}}(i) = I_{\text{PAR}} e^{-kF_i} \quad (\text{S13})$$

where  $I_{\text{PAR}}$  is the PAR in the open, and  $F_i$  is the cumulative leaf area index, in which  $F_i$  reads

$$F_i = \sum_{i=1}^{i=i} \text{LAI}(i) \quad (\text{S14})$$

where  $\text{LAI}$  is the leaf area index and was calculated as follows:

$$\text{LAI}(i) = 0.01335 [b_{\text{leaf}}(i)]^{1.02} \quad (\text{S15})$$

where  $b_{\text{leaf}}(i)$  is the leaf biomass in the  $i$ th layer of shoot.

The regression relationship between phenological points in this study are shown as follows:

$$(t_e - t_b) = 0.14(t_f - t_b)^{1.27} \quad (\text{S16})$$

$$(t_s - t_b) = 0.22(t_f - t_b)^{1.36} \quad (\text{S17})$$
